# Supplementary material
Source: Springer Nature journal article supplement (https://www.springermedizin.de/resource/supplementary/12993_2009_216_MOESM3_ESM.pdf/9617310)

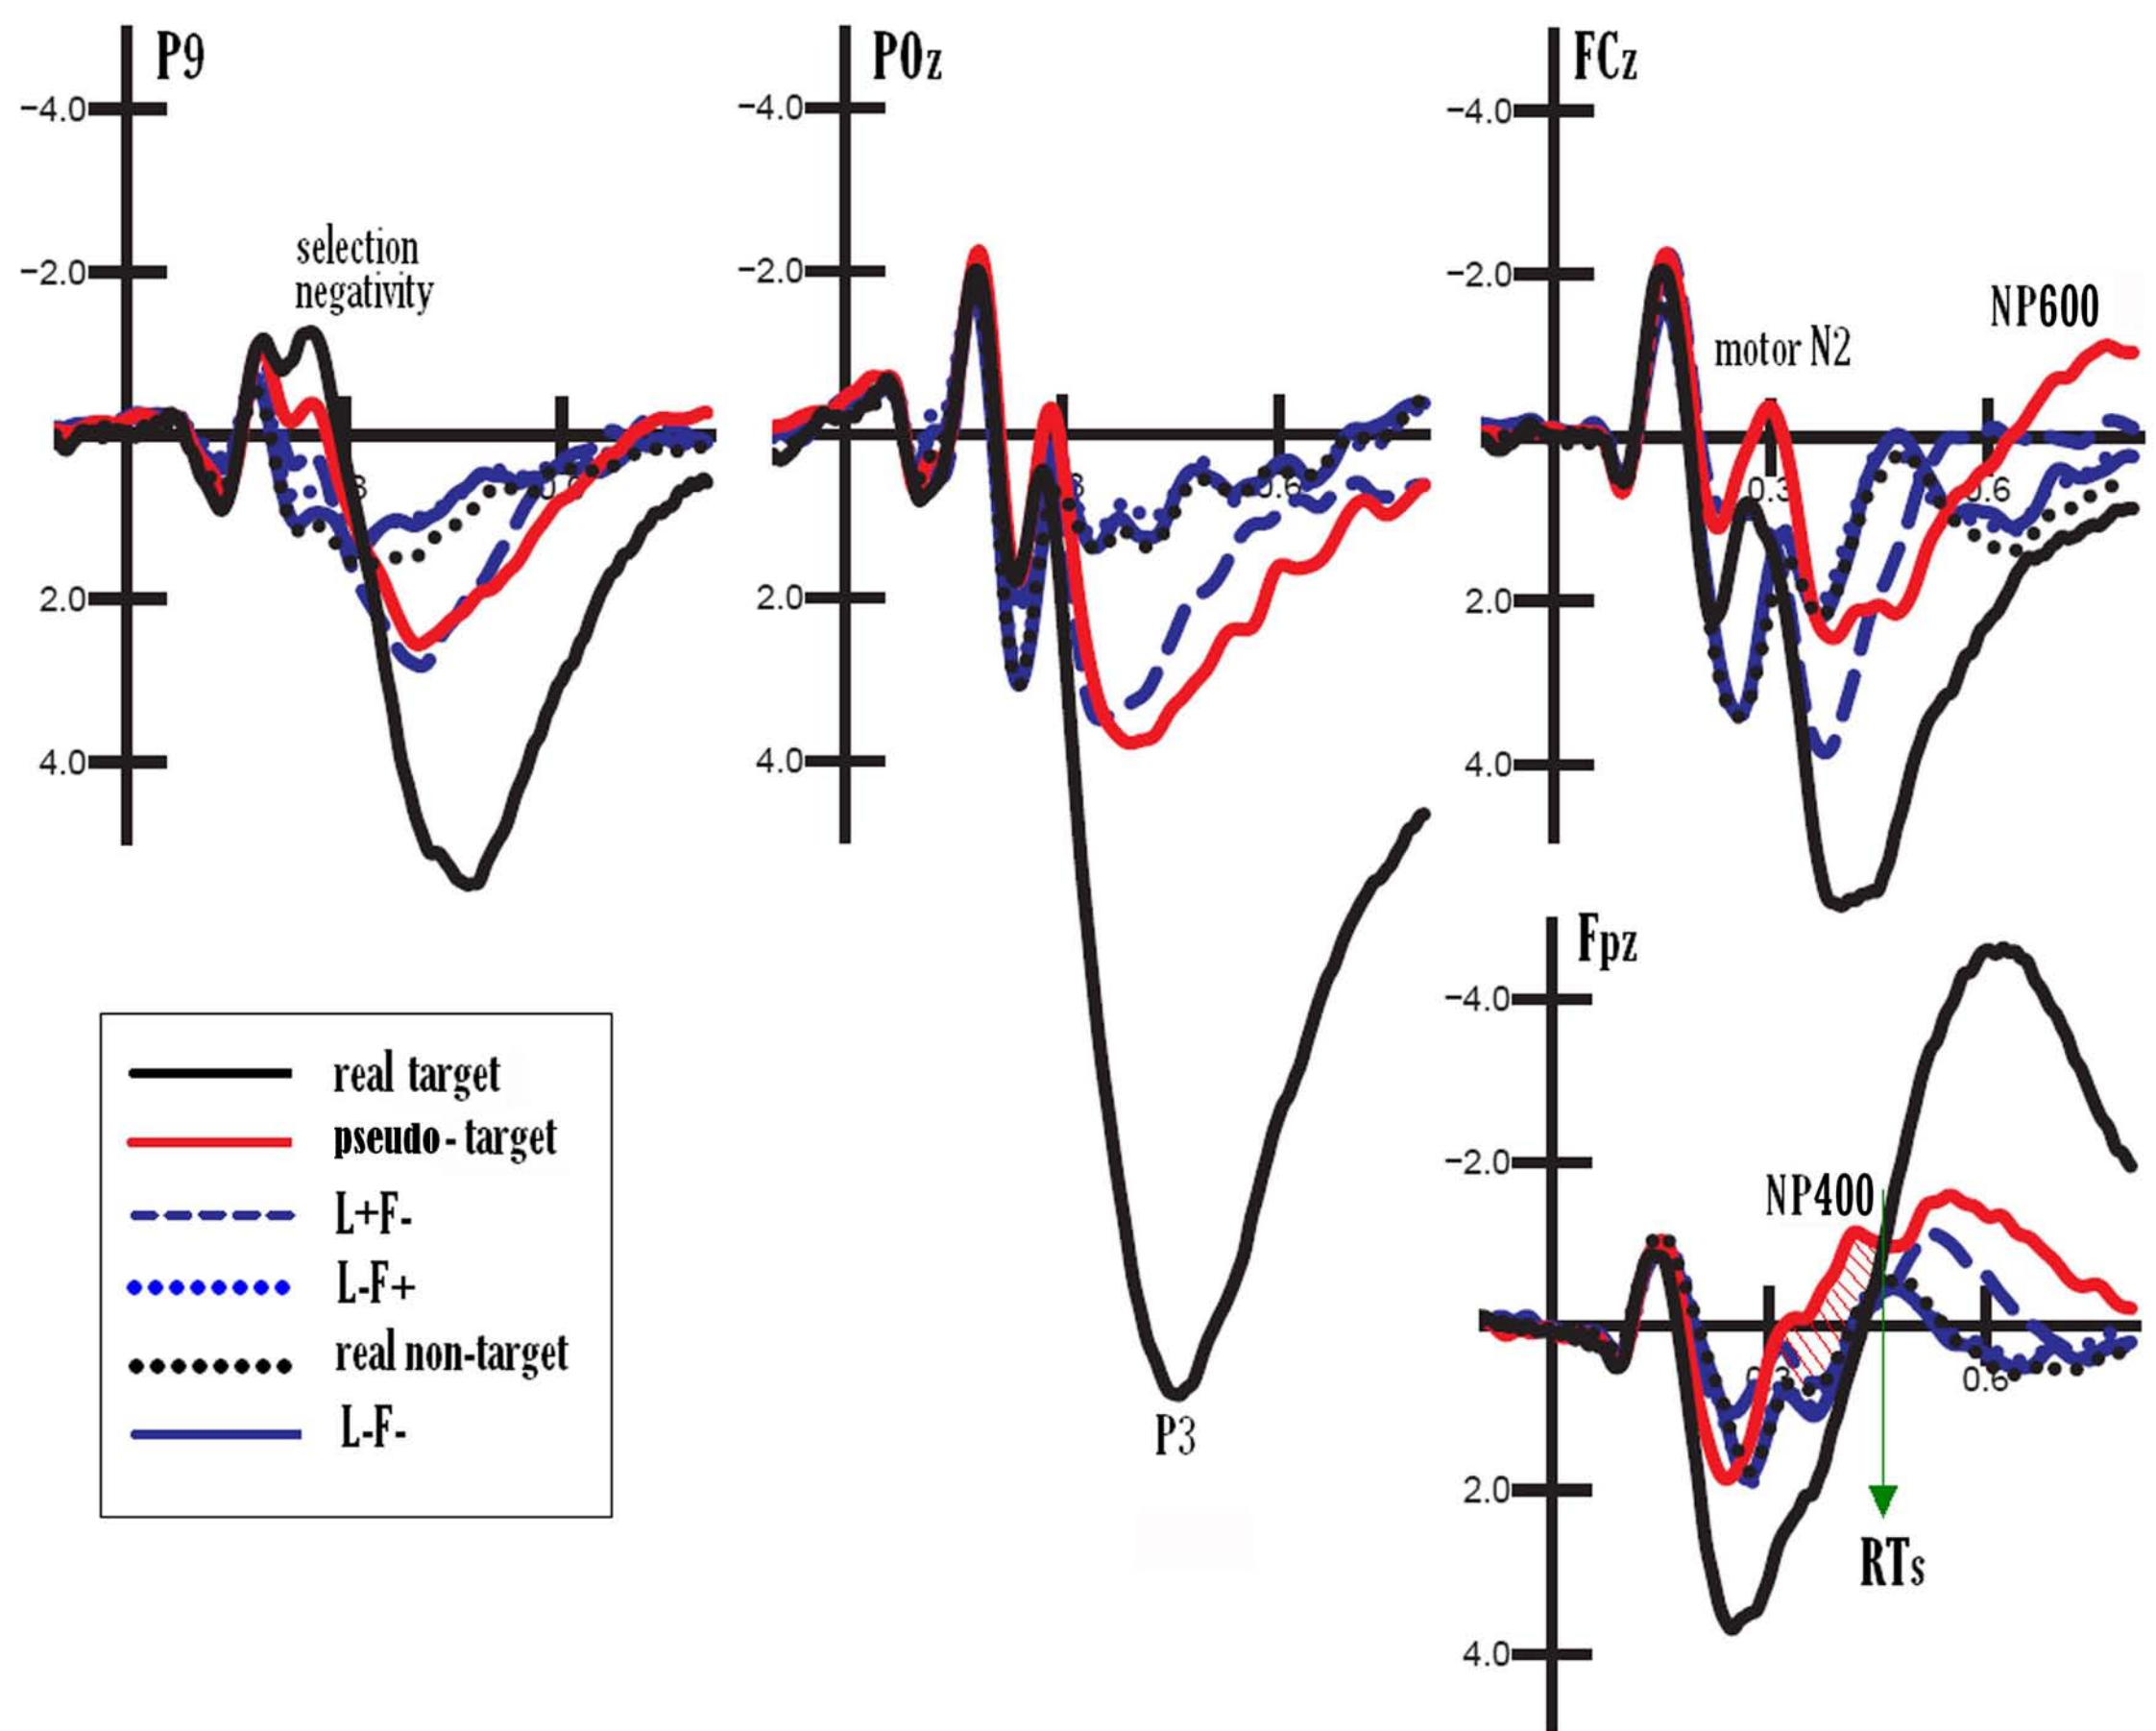

**P9**

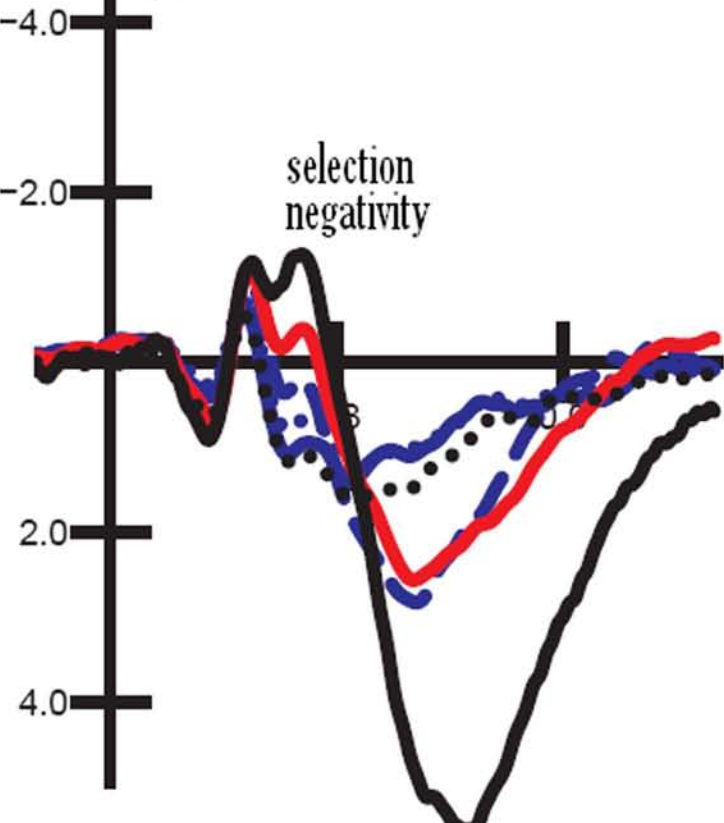

**P0z**

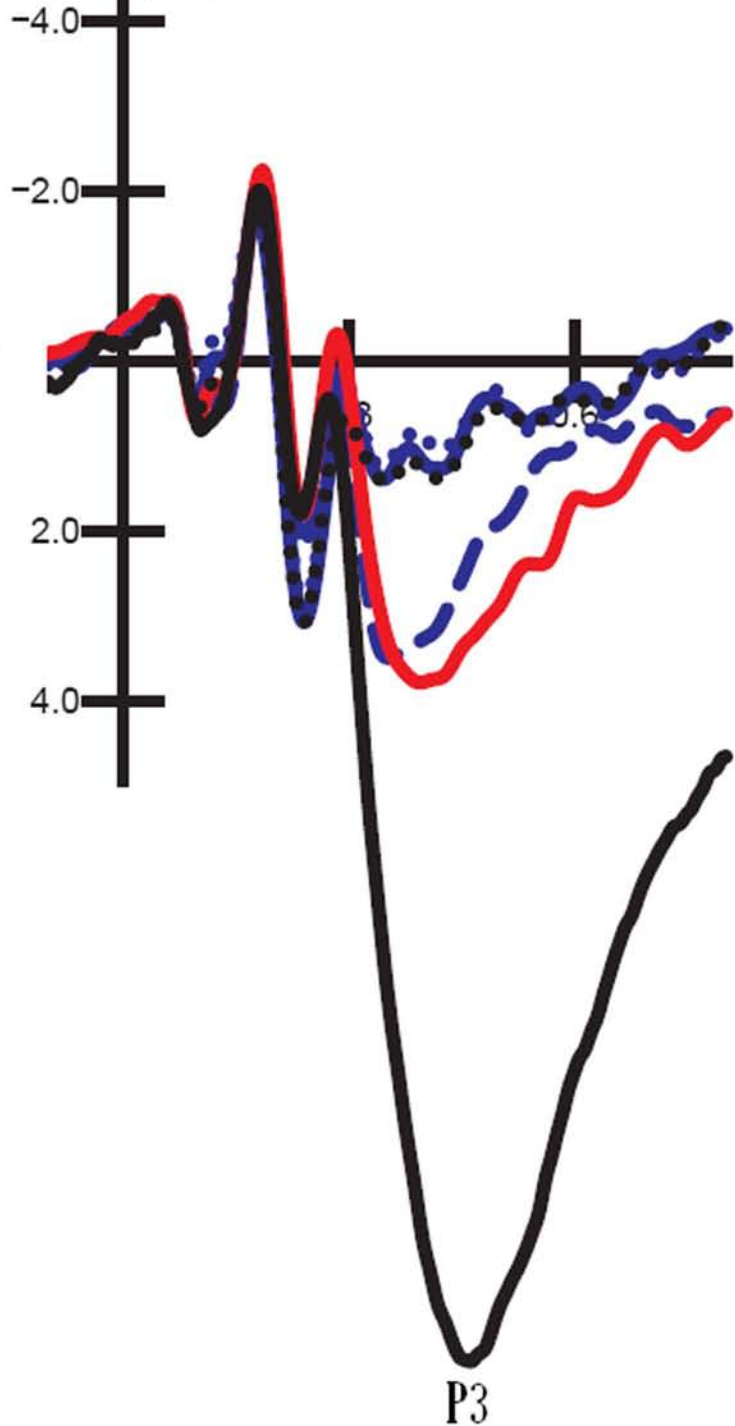

**FCz**

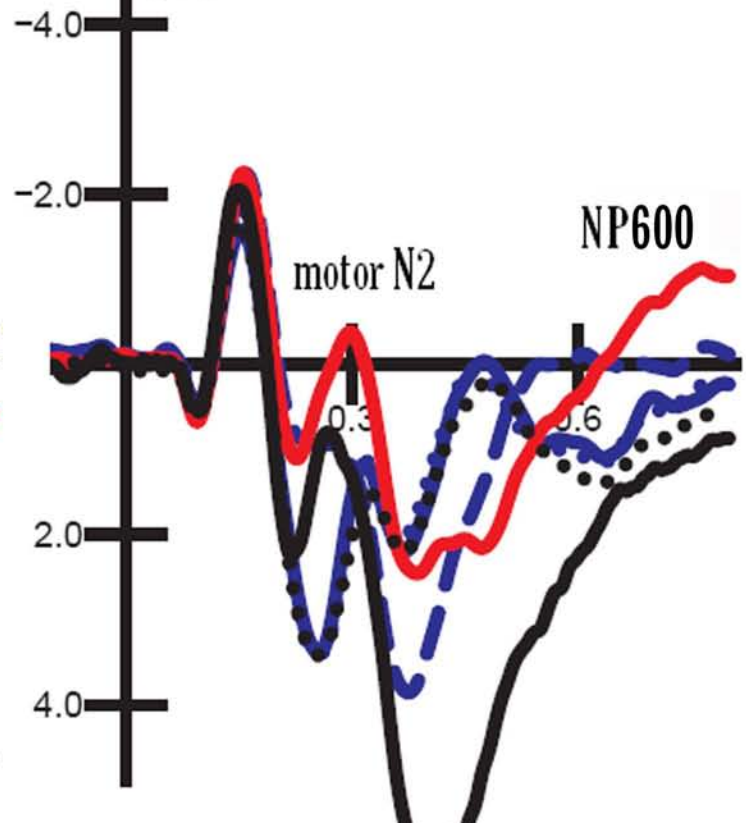

**Fpz**

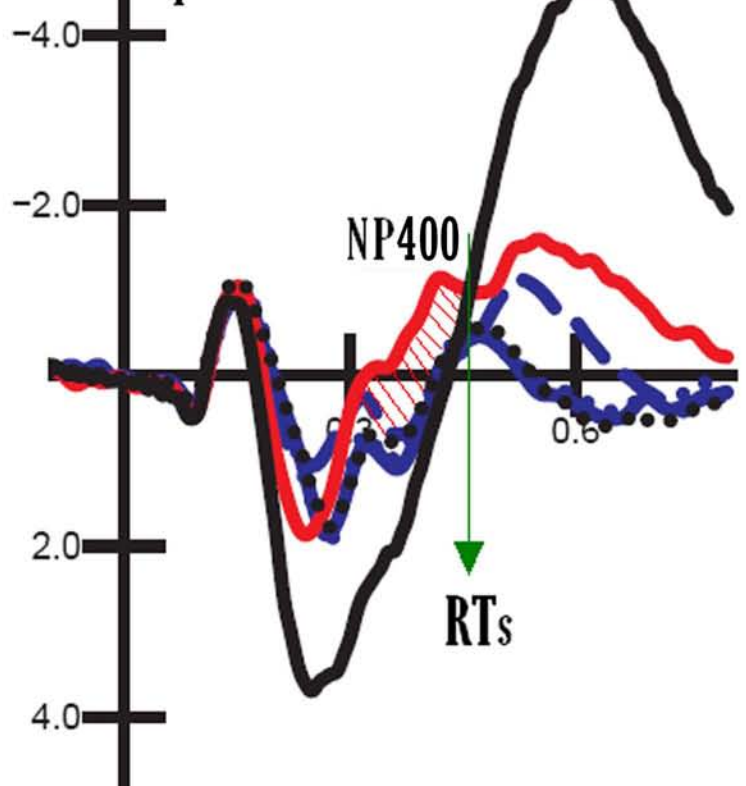

- real target
- pseudo-target
- - - L+F-
- L-F+
- real non-target
- L-F-

Supplement: MOESM3 [file 9617310]
